# Supplementary material
Source: MDPI journal article supplement (https://www.mdpi.com/2072-4292/14/11/2628)
Supplement: s1 [file s1]

**Table S1.** Statistical significance of the difference in OA between the ten models compared using McNemar's test (significant differences with p-value < 0.05 are indicated with \*). McNemar test statistic values are on the left side of the diagonal, and p-values on the right side.

|           | PB_S2    | PB_S2S1  | PB_PL    | PB_S2S1PL | OB_S2    | OB_S2S1 | OB_S2S1T | OB_PL    | OB_S2S1PL | OB_PLS2S1 |
|-----------|----------|----------|----------|-----------|----------|---------|----------|----------|-----------|-----------|
| PB_S2     |          | 0.003    | 0.014    | 0.005     | 0.005    | 0.001   | 0.000    | 0.006    | 0.000     | 0.000     |
| PB_S2S1   | 8.889 *  |          | 0.000    | 1.000     | 1.000    | 0.401   | 0.033    | 0.804    | 0.002     | 0.000     |
| PB_PL     | 6.011 *  | 19.959 * |          | 0.000     | 0.000    | 0.000   | 0.000    | 0.000    | 0.000     | 0.000     |
| PB_S2S1PL | 7.875 *  | 0        | 25.312*  |           | 1.000    | 0.48    | 0.055    | 0.896    | 0.002     | 0.000     |
| OB_S2     | 7.875 *  | 0        | 22.5 *   | 0         |          | 0.327   | 0.026    | 0.892    | 0.004     | 0.000     |
| OB_S2S1   | 11.045 * | 0.706    | 29.557 * | 0.5       | 0.962    |         | 0.118    | 0.651    | 0.041     | 0.002     |
| OB_S2S1T  | 21.121 * | 4.558 *  | 37.837 * | 3.674     | 4.971 *  | 2.450   |          | 0.105    | 0.337     | 0.040     |
| OB_PL     | 7.557 *  | 0.062    | 31.557 * | 0.017     | 0.019    | 0.205   | 2.630    |          | 0.004     | 0.000     |
| OB_S2S1PL | 28 *     | 9.587 *  | 48.944 * | 9.756 *   | 8.163 *  | 4.17 *  | 0.923    | 8.308 *  |           | 0.23      |
| OB_PLS2S1 | 35.309 * | 15.373 * | 59.211 * | 16.568*   | 16.568 * | 9.587 * | 4.225 *  | 14.881 * | 1.44      |           |
